# Supplementary material
Source: PubMed Central journal article supplement (PMC6715369)
Supplement: jci-129-127755-s062.pdf [file jci-129-127755-s062.pdf]

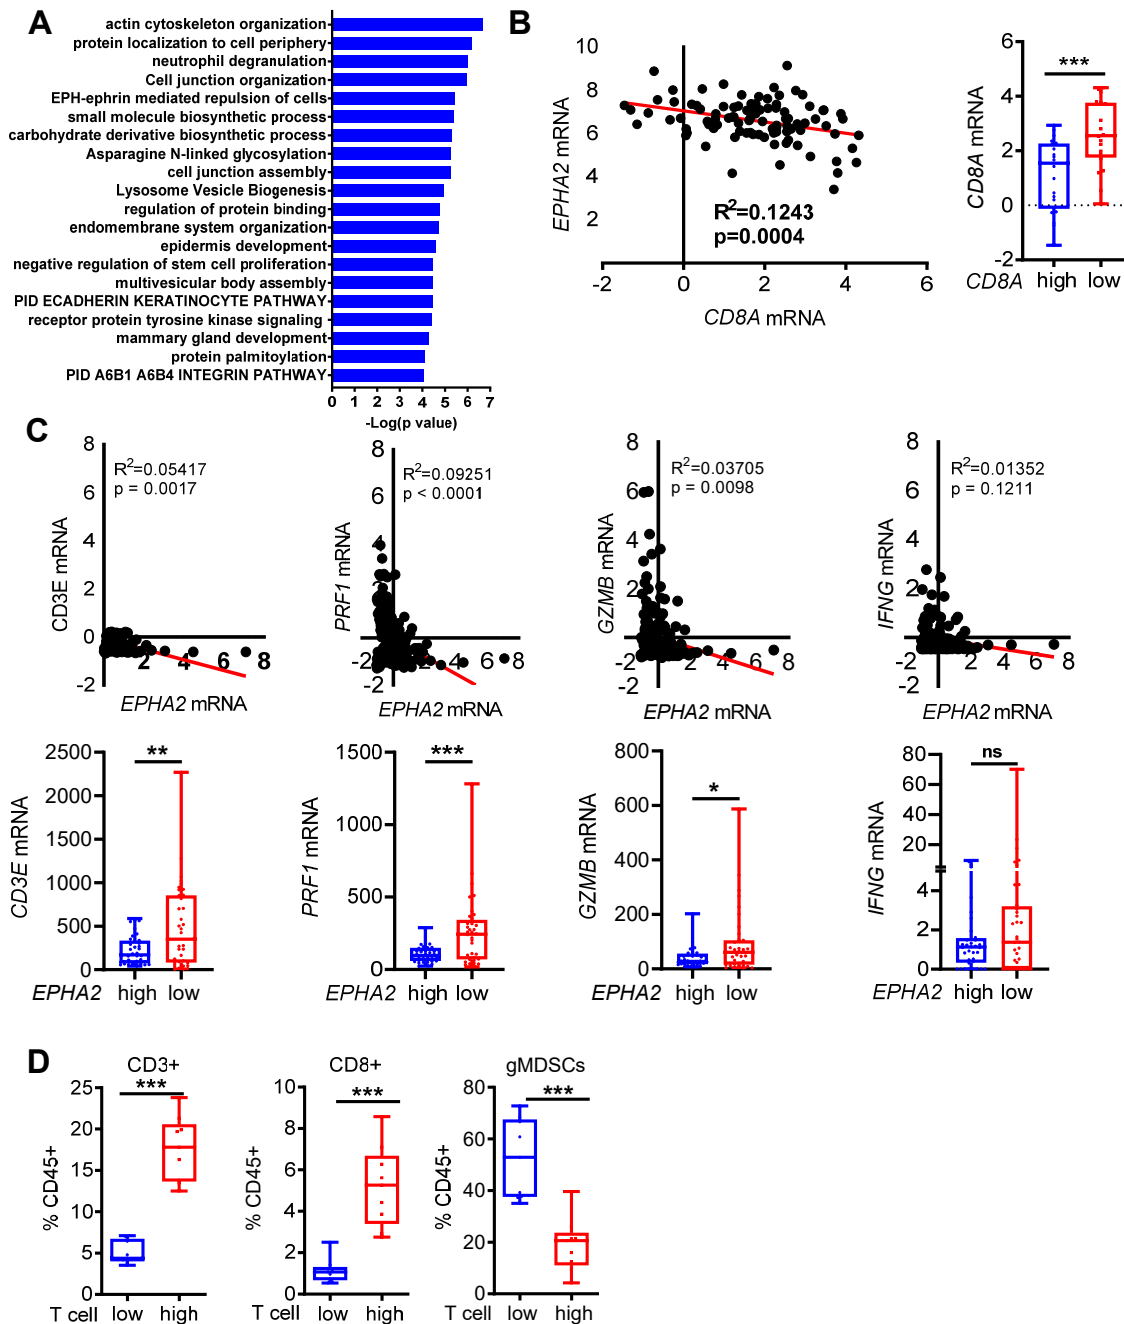

**Figure S1. Expression of *EPHA2* correlates with the abundance of CD8+ T cells in PDA (Related to Figure 1).** (A) Top pathways from Metascape analysis of genes negatively correlated with *CD8A* in human TCGA PDA dataset. (B) Correlation of transcript abundance for *CD8A* and *EPHA2* (left) and abundance of *CD8A* mRNA in the top and bottom 20% of *EPHA2* expression (right) in human PDA samples (QCMG\_Nature\_2016 dataset, cbiportal). (C) Correlation of transcript abundance (top row) and abundance of *CD3E*, *PRF1*, *GZMB* and *IFNG* transcripts (bottom row) in the top and bottom 20% of *EPHA2* expression, in human TCGA PDA dataset. (D) Flow cytometric analysis of immune cell populations in subcutaneously implanted T cell low and T cell high tumors derived from indicated clones (n=10/group). In (B-D), data presented as boxplots with horizontal lines and error bars indicating mean and range, respectively. Statistical analysis by Students' unpaired t-test (B, C, D) with significance indicated (\*,  $p<0.05$ ; \*\*,  $p<0.01$ ; \*\*\*,  $p<0.001$ ; \*\*\*\*,  $p<0.0001$ ; ns, not significant in this and all subsequent figures, unless otherwise indicated).

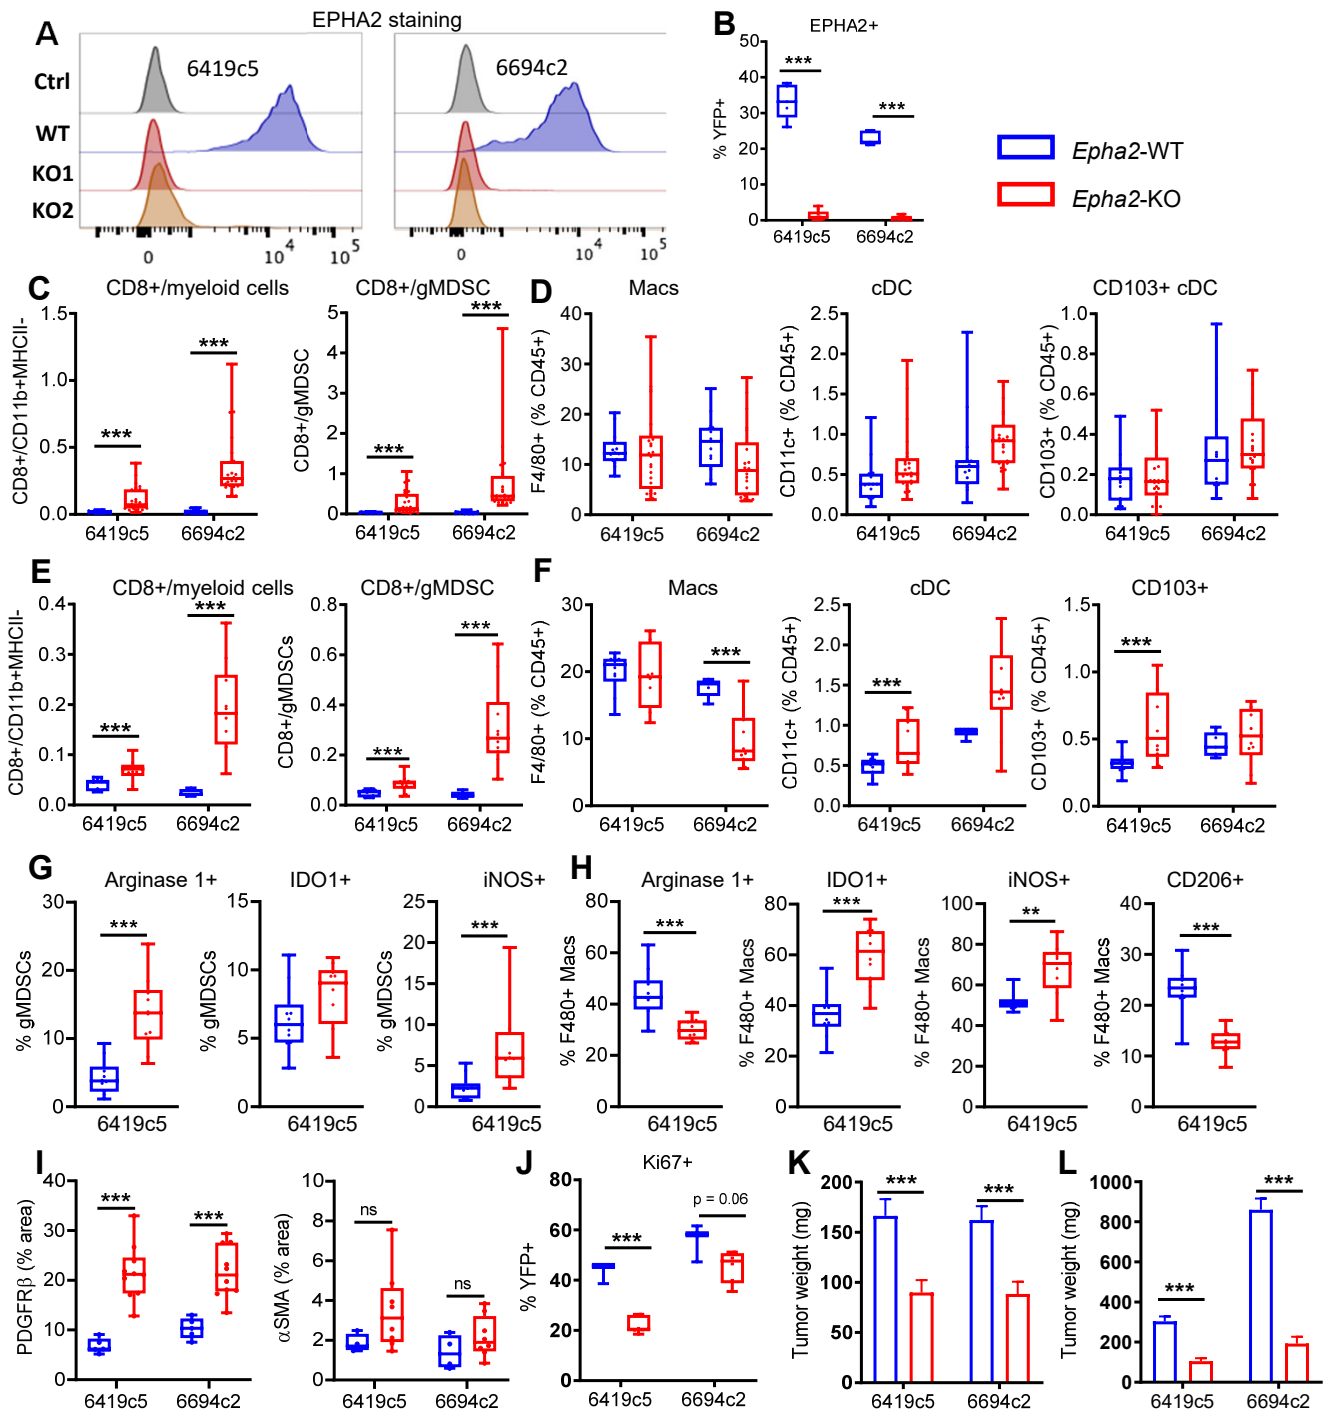

**Figure S2. Tumor cell-intrinsic *Epha2* regulates T cell infiltration (Related to Figure 2).** (A-B) Representative histogram (A) and quantification (B) of EPHA2 protein expression in subcutaneous *Epha2*-WT and *Epha2*-KO tumors from indicated clones (n=5/group). (C-F) Flow cytometric analysis of immune cell populations in subcutaneous (C-D, n=12-25/group) and orthotopic (E-F, n=5-10/group) tumors from *Epha2*-WT and *Epha2*-KO tumors from indicated clones. (G-H) Flow cytometric analysis of gMDSCs and Macs in subcutaneous *Epha2*-WT and *Epha2*-KO tumors from indicated clone (n=10/group). (I) Quantification of αSMA and PDGFRβ stainings in subcutaneous *Epha2*-WT and *Epha2*-KO tumors from indicated clones (n=4-10/group). (J) Proportions of Ki67+ tumor cells among cultured *Epha2*-WT and *Epha2*-KO tumor cells, by flow cytometry (n=3-6/group). (K-L) Weights of implanted subcutaneous (K, n=12-25/group) and orthotopic (L, n=5-10/group) *Epha2*-WT and *Epha2*-KO tumors from indicated clones, 21 days post implantation. Statistical difference between groups calculated using Student's unpaired t-test (B-L).

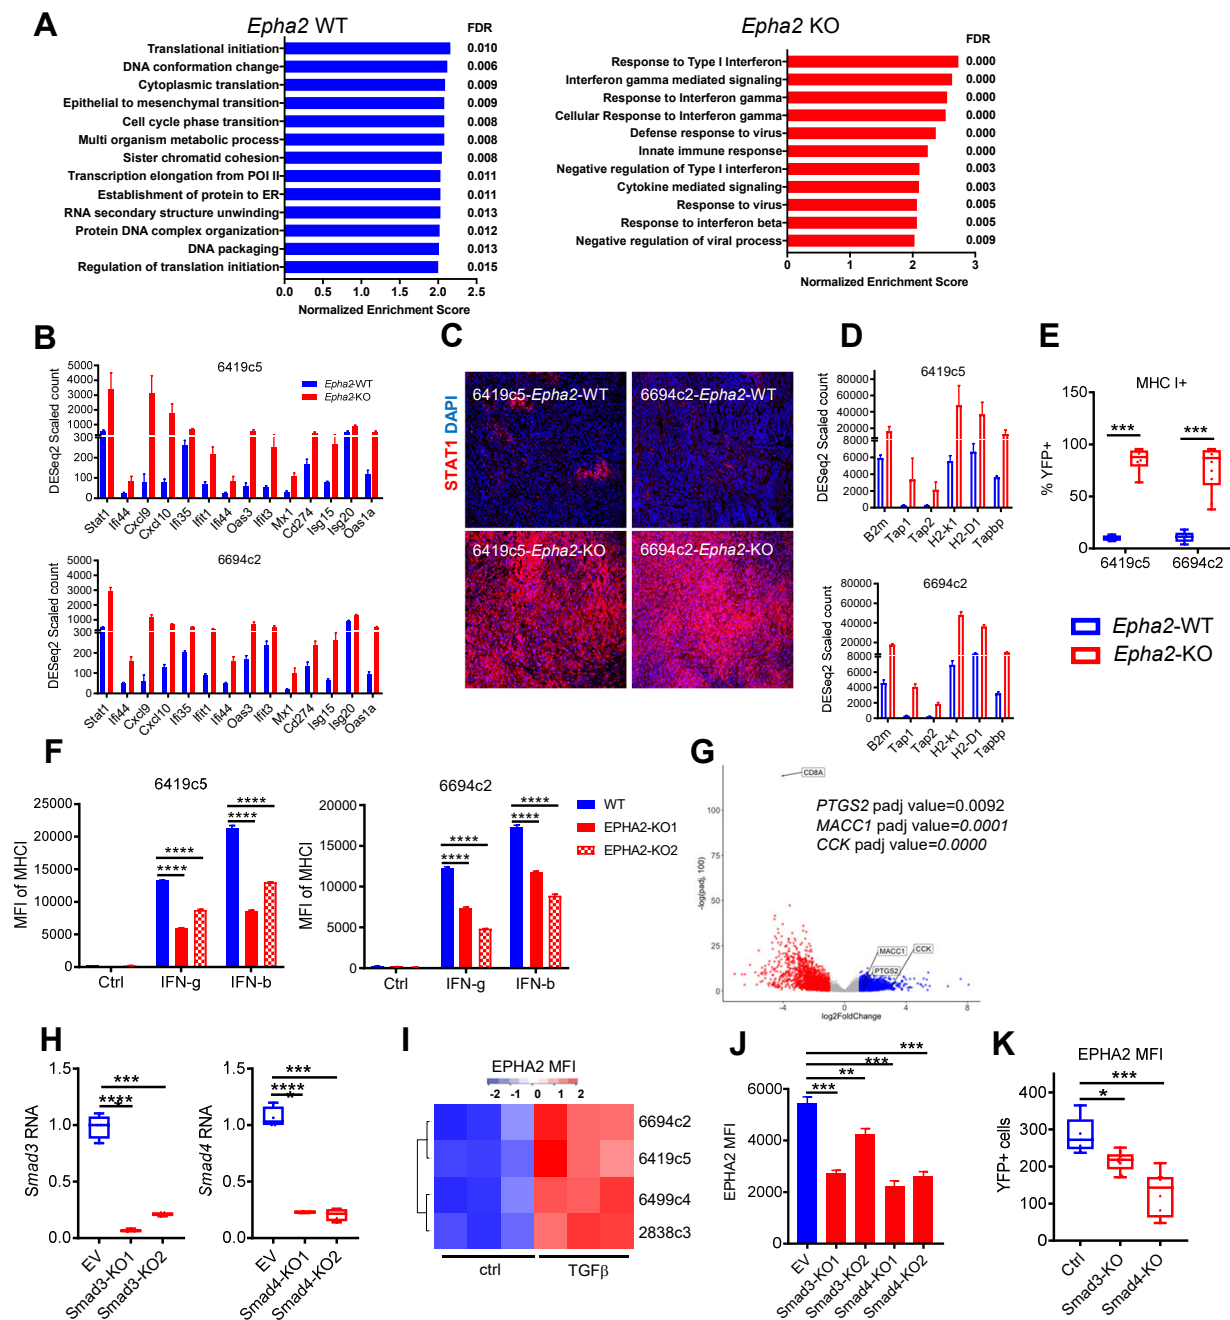

**Figure S3. TGFβ-SMAD3, 4-PTGS2 axis as potential tumor cell-intrinsic regulator of TME (Related to Figure 4).** (A) Gene set enrichment analysis of differentially expressed genes in *Epha2*-WT or *Epha2*-KO tumor cells using the GO biological processes gene sets (n=3-8/group). (B) Interferon responsive genes in tumor cells from implanted tumors (n=3-8/group). (C) Representative IF images of STAT1 staining (red) in tumors (n=3/group). (D) Antigen presentation genes on implanted tumor cells (n=3-8/group). (E) Proportions of MHC I+ YFP+ tumor cells in implanted tumors (n=5/group). (F) MHC I protein expression on YFP+ tumor cells *in vitro* after 24 hours with either no treatment (ctrl) or IFN $\gamma$ , or IFN $\beta$  treatments (n=3/group). (G) Differentially expressed genes identified in human T cell high (red) and T cell low (blue) PDA tumors (top and bottom 20% of *CD8A* expression). Genes with padj<0.05 and log2foldChange>2 shown. (H) Relative expression of *Smad3* and *Smad4* in control (EV) and KO tumor cell clones generated from 6419c5. Data from n=4 independent experiments. (I) EPHA2 protein expression in PDA tumor cell clones treated with either PBS or TGFβ for 72 hours. Data from n=3 independent experiments. Color key represents the normalized Z score. (J) EPHA2 protein expression on *Smad3* and *Smad4* KO cell lines *in vitro* (n=3/group). (K) EPHA2 protein expression in YFP+ cells from control and *Smad3* and *Smad4* KO tumors (n=5-9/group). In (E, H, K) data presented as boxplots with horizontal lines and error bars indicating mean and range, respectively. In (B, D, F and J), data presented as mean with error bars indicating SEM. Statistical difference between two groups calculated by Student's unpaired t-test (E), between multiple groups determined by one-way ANOVA with Tukey's HSD post-test (F, H, J, K).

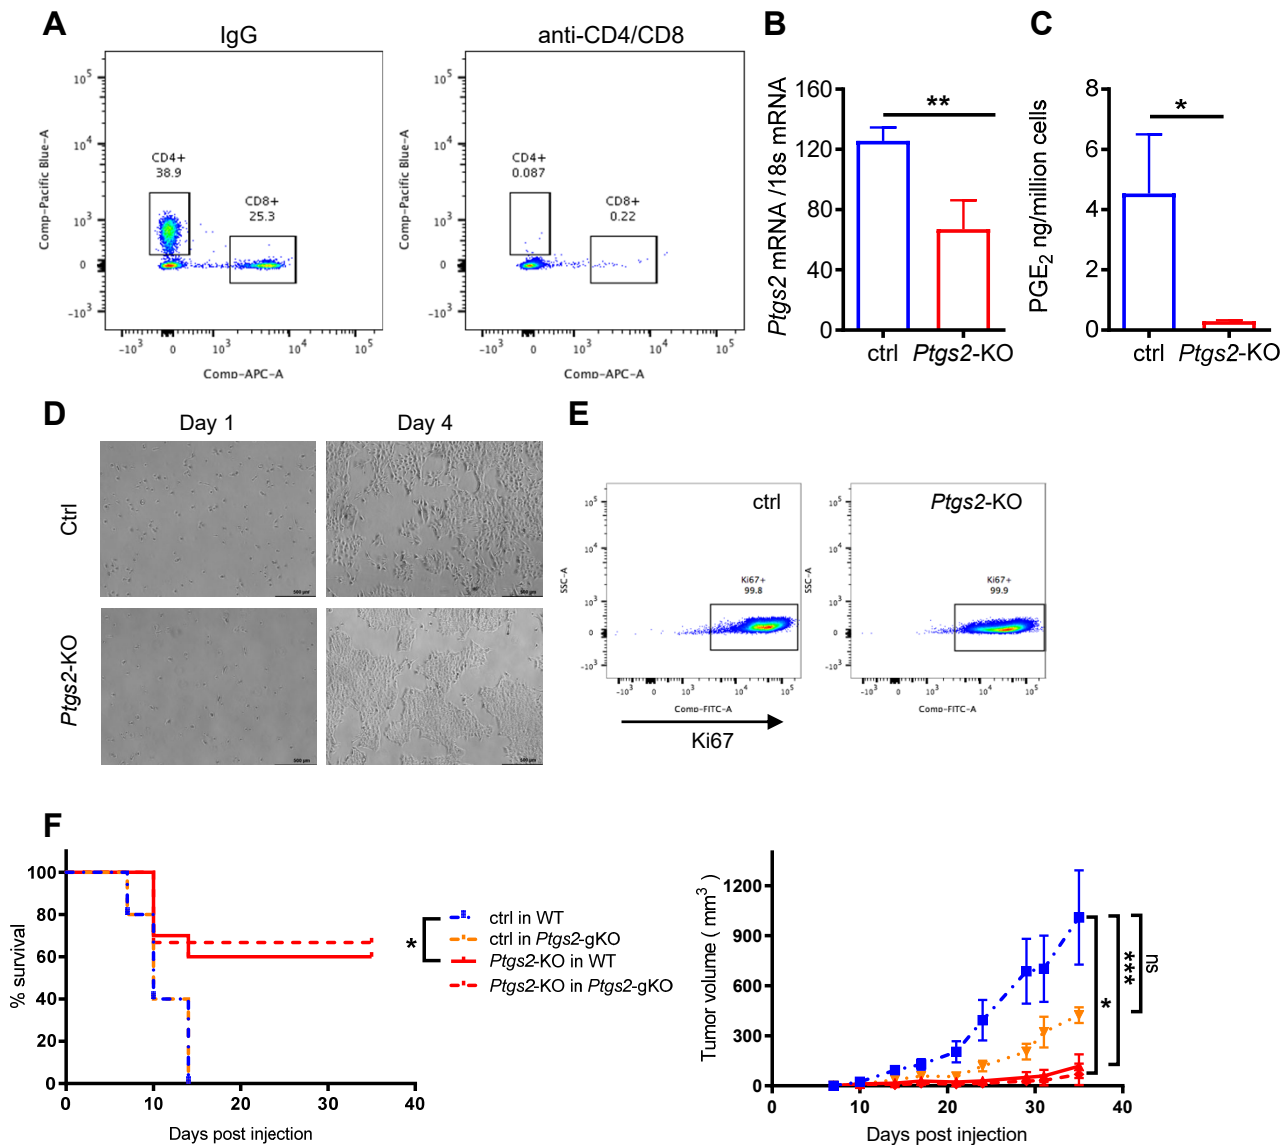

**Figure S4. Effect of *Ptgs2* deletion on PDA cells in vitro and in vivo (Related to Figure 5). (A)** T cell depletion check by flow cytometry on day 35 post tumor implantation. **(B-C)** Relative *Ptgs2* mRNA expression (B) and extracellular PGE<sub>2</sub> levels (C) measured in control (ctrl, Cas9, no gRNA, transduced) and *Ptgs2*-KO (Cas9/ *Ptgs2* gRNA transduced) KPC cell line conditioned media (n=3/group). **(D)** Control (ctrl) and *Ptgs2*-KO KPC cells plated 50000 cells/well on 6 well plates. Phase contrast 4X images taken on day 1 and day 4 in culture (representative image of 3/group). **(E)** Ki67+ control (ctrl) and *Ptgs2*-KO cells, shown as percent of live cells; flow cytometry performed on day 3 in culture. **(F)** Control (ctrl) and *Ptgs2*-KO KPC cell lines injected in WT and global *Ptgs2* knockout (*Ptgs2*-gKO) mice (n=5-10/group); tumor free survival (left) and tumor growth (right). In (B-C) data presented as mean with error bars indicating SEM. Statistical differences calculated using Students' unpaired t-test (B-C) and linear mixed-effects model with Tukey's HSD post-test using the lme4 and survival package in R (F).

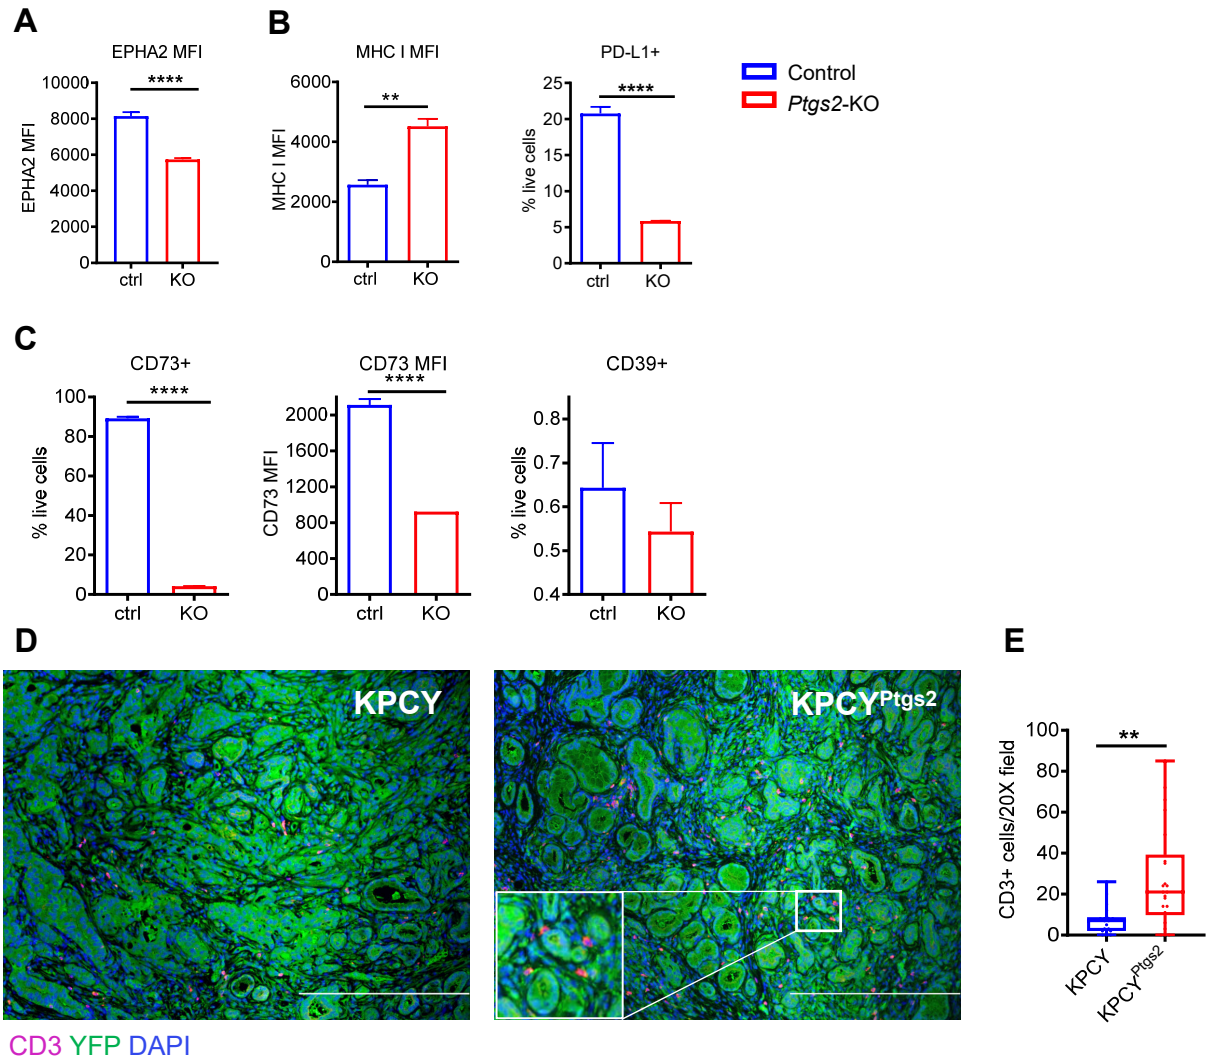

**Figure S5. Effect of *Ptgs2* deletion on tumor cells and TME in vitro and in vivo (Related to Figure 6).** (A-C) Flow cytometric analysis of control (ctrl) and *Ptgs2*-KO tumor cells after 48 hours in culture (representative experiment of 2, n=3/group). (D-E) Representative 20X images (D) and quantification (E) of CD3+ cells (red) in autochthonous tumors from KPCY and KPCY<sup>Ptgs2</sup> mice (n=20-25 fields/group). YFP+ cells and nuclei stained in green and blue, respectively. Small square in (D) represents the cropped 20X area shown in the inset (big square). Data presented as mean with error bars indicating SEM (A-C) and boxplots with horizontal lines and error bars indicating mean and range, respectively (E). Statistical differences calculated using Students' unpaired t-test in GraphPad Prism.

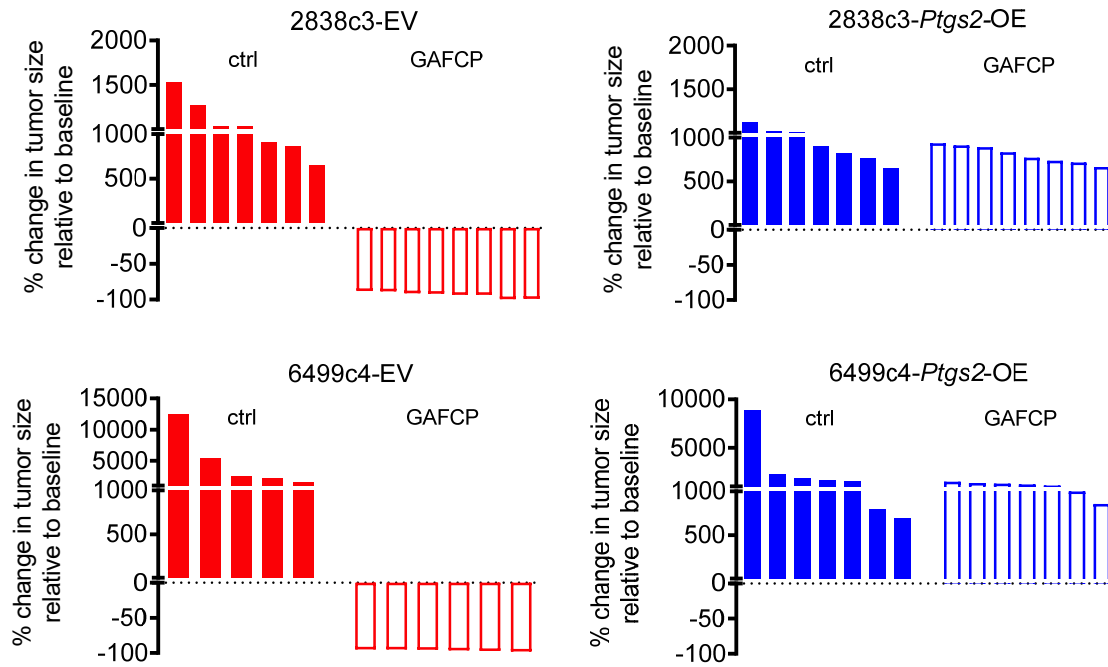

**Figure S6. Tumor cell-intrinsic *Ptgs2* promotes resistance to immunotherapy in PDA (Related to Figure 7).** Tumor size change relative to the baseline in parental (EV) and *Ptgs2*-OE T cell high tumors with or without the GAFCP treatment. Tumor cells implanted subcutaneously into C57BL/6 mice (n=5-8/group). GAFCP treatment started 9 days post implantation at 3-5 mm tumor diameter.

**Supplemental Table 1. Experimental Models: Tumor Cells and Mouse Strains**

| <b>Tumor Cells</b>                                                                                                                            | <b>Source</b>                 |
|-----------------------------------------------------------------------------------------------------------------------------------------------|-------------------------------|
| PENN 6419c5                                                                                                                                   | Generated/B.Z.<br>Stanger     |
| PENN 6694c2                                                                                                                                   | Generated/B.Z.<br>Stanger     |
| PENN 2838c3                                                                                                                                   | Generated/B.Z.<br>Stanger     |
| PENN 6499c4                                                                                                                                   | Generated/B.Z.<br>Stanger     |
| PENN 4662                                                                                                                                     | Generated/R.H.<br>Vonderheide |
| <b>Mouse Strains</b>                                                                                                                          | <b>Source</b>                 |
| Kras <sup>LSL-G12D/+</sup> ;Trp53 <sup>LSL-R172H/+</sup> ;Pdx1-Cre <sup>+/-</sup> ;<br>Rosa26 <sup>YFP/YFP</sup>                              | Generated                     |
| Kras <sup>LSL-G12D/+</sup> ;Trp53 <sup>LSL-R172H/+</sup> ;Pdx1-Cre <sup>+/-</sup> ;<br>Rosa26 <sup>YFP/YFP</sup> ; Ptgs2 <sup>flox/flox</sup> | Generated/R.H.<br>Vonderheide |
| Tamoxifen-inducible Cre <sup>+/-</sup> Ptgs2 <sup>flox/flox</sup>                                                                             | Generated/G.A.<br>FitzGerald  |

**Supplemental Table 2. Antibodies for Flow Cytometry**

| Target and clone                     | Source        | Identifier |
|--------------------------------------|---------------|------------|
| CD335 (NKp46) FITC (29A1.4)          | Biolegend     | 137606     |
| CD279 (PD-1) FITC (29F.1A12)         | Biolegend     | 135214     |
| FOXP3 PE (MF23)                      | BD            | 560408     |
| FOXP3 APC (FJK-16s)                  | eBioscience   | 17-5773-82 |
| CD8a PE-CF594 (53-6.7)               | BD            | 562283     |
| CD8a APC-C7 (53-6.7)                 | BD Pharmingen | 557654     |
| CD103 PE/Dazzle 594 (2E7)            | Biolegend     | 121430     |
| CD103 PE-Cy7 (2E7)                   | Biolegend     | 121426     |
| CD223 (Lag-3) PE/Dazzle 594 (C9B7W)  | Biolegend     | 125224     |
| CD3e PE/Cy5 (145-2C11)               | Biolegend     | 100310     |
| CD11c PE/Cy5 (N418)                  | Biolegend     | 117316     |
| CD45 AF700 (30-F11)                  | Biolegend     | 103128     |
| CD8a PE/Cy7 (53-6.7)                 | Biolegend     | 100722     |
| I-A/I-E (MHCII) PE/Cy7 (M5/114.15.2) | Biolegend     | 107630     |
| CD44 V450 (IM7)                      | BD            | 560451     |
| Ly-6G V450 (1A8)                     | BD            | 560603     |
| H-2Kb/H-2Db (MHCI) AF647 (28-8-6)    | Biolegend     | 114612     |
| Granzyme B AF647 (GB11)              | Biolegend     | 515406     |
| F4/80 APC/Cy7 (BM8)                  | Biolegend     | 123118     |
| CD279 (PD-1) APC/Cy7 (29F.1A12)      | Biolegend     | 135224     |
| Ki67 AF700 (B56)                     | BD            | 561227     |
| CD11b PerCP-Cy5.5 (M1/70)            | BD            | 550993     |
| CD11b APC (M1/70)                    | BD            | 553312     |
| CD366 (Tim-3) PerCP-Cy5.5 (RMT3-23)  | Biolegend     | 119718     |
| Nur77 PerCP-eFluor710 (12.14)        | eBioscience   | 46-5965-82 |
| CD19 BV605 (6D5)                     | Biolegend     | 115540     |



**Supplemental Table 3. Antibodies for Flow Cytometry**

| Target and clone                | Source                     | Identifier |
|---------------------------------|----------------------------|------------|
| CD11c BV605 (N418)              | Biolegend                  | 117334     |
| CD152 (CTLA-4) BV605 (UC10-4B9) | Biolegend                  | 106323     |
| Ly-6C BV570 (HK1.4)             | Biolegend                  | 128030     |
| CD45 BV570 (30-F11)             | Biolegend                  | 103136     |
| CD4 BV650 (RM4-5)               | Biolegend                  | 100546     |
| CD8a BV785 (53-6.7)             | Biolegend                  | 100750     |
| CD90.1 BV650 (OX-7)             | Biolegend                  | 202533     |
| CD45.1 APC-Cy7 (A20)            | Biolegend                  | 110715     |
| Arginase1 PE (A1exF5)           | eBioscience                | 12-3697-82 |
| IDO AF647 (2E2/IDO1)            | Biolegend                  | 654004     |
| iNOS AF488 (CXNFT)              | eBioscience                | 53-5920-82 |
| IL-10 FITC (JES5-16E3)          | Biolegend                  | 505006     |
| PD-L1 PE-Cy7 (10F.9G2)          | Biolegend                  | 124314     |
| PD-1 PE-Cy7 (RMPI-30)           | Biolegend                  | 109110     |
| IL-12 PECy7 (C15.6)             | Biolegend                  | 505210     |
| G-CSF eFluor660 (9B4CSF)        | ThermoFisher<br>Scientific | 50-7353-82 |
| GM-CSF PE (MP1-22E9)            | Biolegend                  | 505406     |
| NK1.1 APC Cy7 (PK136)           | Biolegend                  | 108724     |
| XCR1 FITC (ZET)                 | Biolegend                  | 148210     |
| CD39 PE-Cy7 (Duha 59)           | Biolegend                  | 143806     |
| CD73 BV605 (Ty/11.8)            | Biolegend                  | 127215     |
| GR1 PE (RB6-8C5)                | Biolegend                  | 108408     |

**Supplemental Table 4. Antibodies for Flow Cytometry**

| Target and clone                           | Source                  | Identifier   |
|--------------------------------------------|-------------------------|--------------|
| SIRP $\alpha$ APC-Cy7 (P84)                | Biolegend               | 144014       |
| CCR7 PE-Cy5 (4B12)                         | Biolegend               | 120114       |
| CD31 APC-Cy7 (ER-MP12)                     | Abcore                  | AC16-0061-05 |
| ROR $\gamma$ T FITC (4G419)                | Abcam                   | Ab104906     |
| Caspase 3 activated FITC (A7R34)           | BD                      | 550480       |
| CD86 BV785 (GL-1)                          | Biolegend               | 105043       |
| GATA3 PE-Cy7 (L50-823)                     | BD                      | 560405       |
| T-bet Pacific Blue (4B10)                  | Biolegend               | 644808       |
| B220 BV711 (RA3-6B2)                       | BD                      | 563892       |
| CD64 PE-CF594 (145-2C11)                   | BD                      | 562286       |
| Live/Dead Fixable Aqua Dead Cell stain kit | ThermoFisher Scientific | L34957       |

**Supplemental Table 5. Gating Strategies**

| Gating Strategies |                                                  |
|-------------------|--------------------------------------------------|
| Tumor cells       | Live CD45- CD31-                                 |
| Th1               | Live CD45+ CD3+ CD4+ T-bet+                      |
| Th2               | Live CD45+ CD3+ CD4+ GATA3+                      |
| Treg              | Live CD45+ CD3+ CD4+ FOXP3+                      |
| Th17              | Live CD45+ CD3+ CD4+ RORgt+                      |
| Macrophages       | Live CD45+ F4/80+ CD11b+                         |
| cDC               | Live CD45+ F4/80- lineage- MHC II+ CD11c+        |
| cDC1              | Live CD45+ F4/80- lineage- MHC II+ CD11c+ xCR1+  |
| cDC2              | Live CD45+ F4/80- lineage- MHC II+ CD11c+ SIRPa+ |
| MDSC              | Live CD45+ CD11b+ Gr1+                           |
| Neutrophils       | Live CD45+ F4/80- Gr1+                           |
| Myeloid cells     | Live CD45+ CD11b+ MHCII- or Live CD45+ CD11b+    |
| gMDSC             | Live CD45+ CD11b+ MHCII- Ly6G+ Ly6C+             |

**Supplemental Table 6. Antibodies for Immunofluorescent and Immunohistochemistry Stainings**

| Target and antibody dilution           | Source                     | Identifier |
|----------------------------------------|----------------------------|------------|
| CD3 Rabbit 1:50                        | Abcam                      | ab5690     |
| GFP Goat 1:500                         | Abcam                      | ab6673     |
| COX-2 rabbit monoclonal antibody 1:100 | ThermoFisher<br>Scientific | RM-9121-R7 |
| $\alpha$ SMA 1:100                     | Abcam                      | ab5694     |
| PDGFR $\beta$ 1:100                    | Abcam                      | ab32570    |
